# Supplementary material
Source: PubMed Central journal article supplement (PMC6703712)
Supplement: develop-146-170241-s1.pdf [file develop-146-170241-s1.pdf]

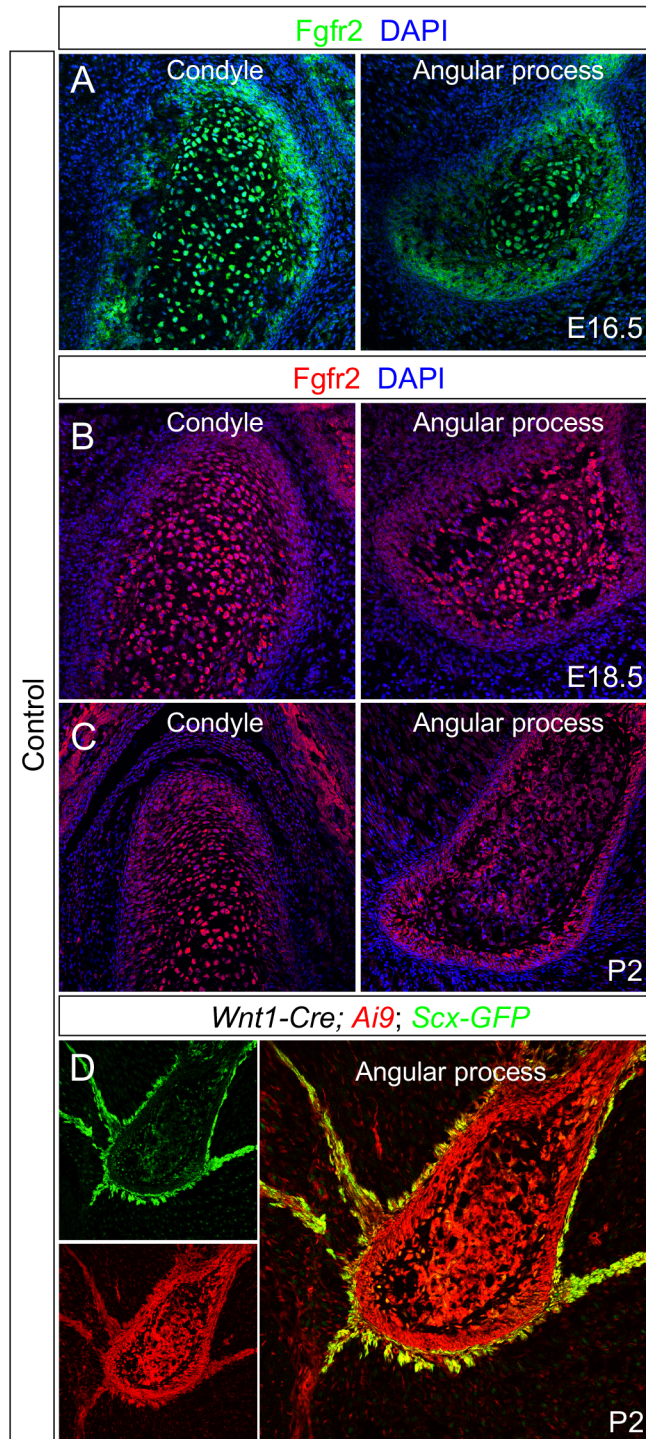

**Figure S1. Mandibular entheses and tendons are NCC-derived and express Fgfr2.** Immunofluorescence shows Fgfr2 expression in coronal sections of the control condyle and angular process at E16.5 (A), E18.5 (B), and P2 (C) (n=3 for each stage). (D) Coronal section of the *Wnt1-Cre; Ai9; Scx-GFP* angular process shows that the mandibular tendons and their entheses are derived from neural crest cells (n=3).

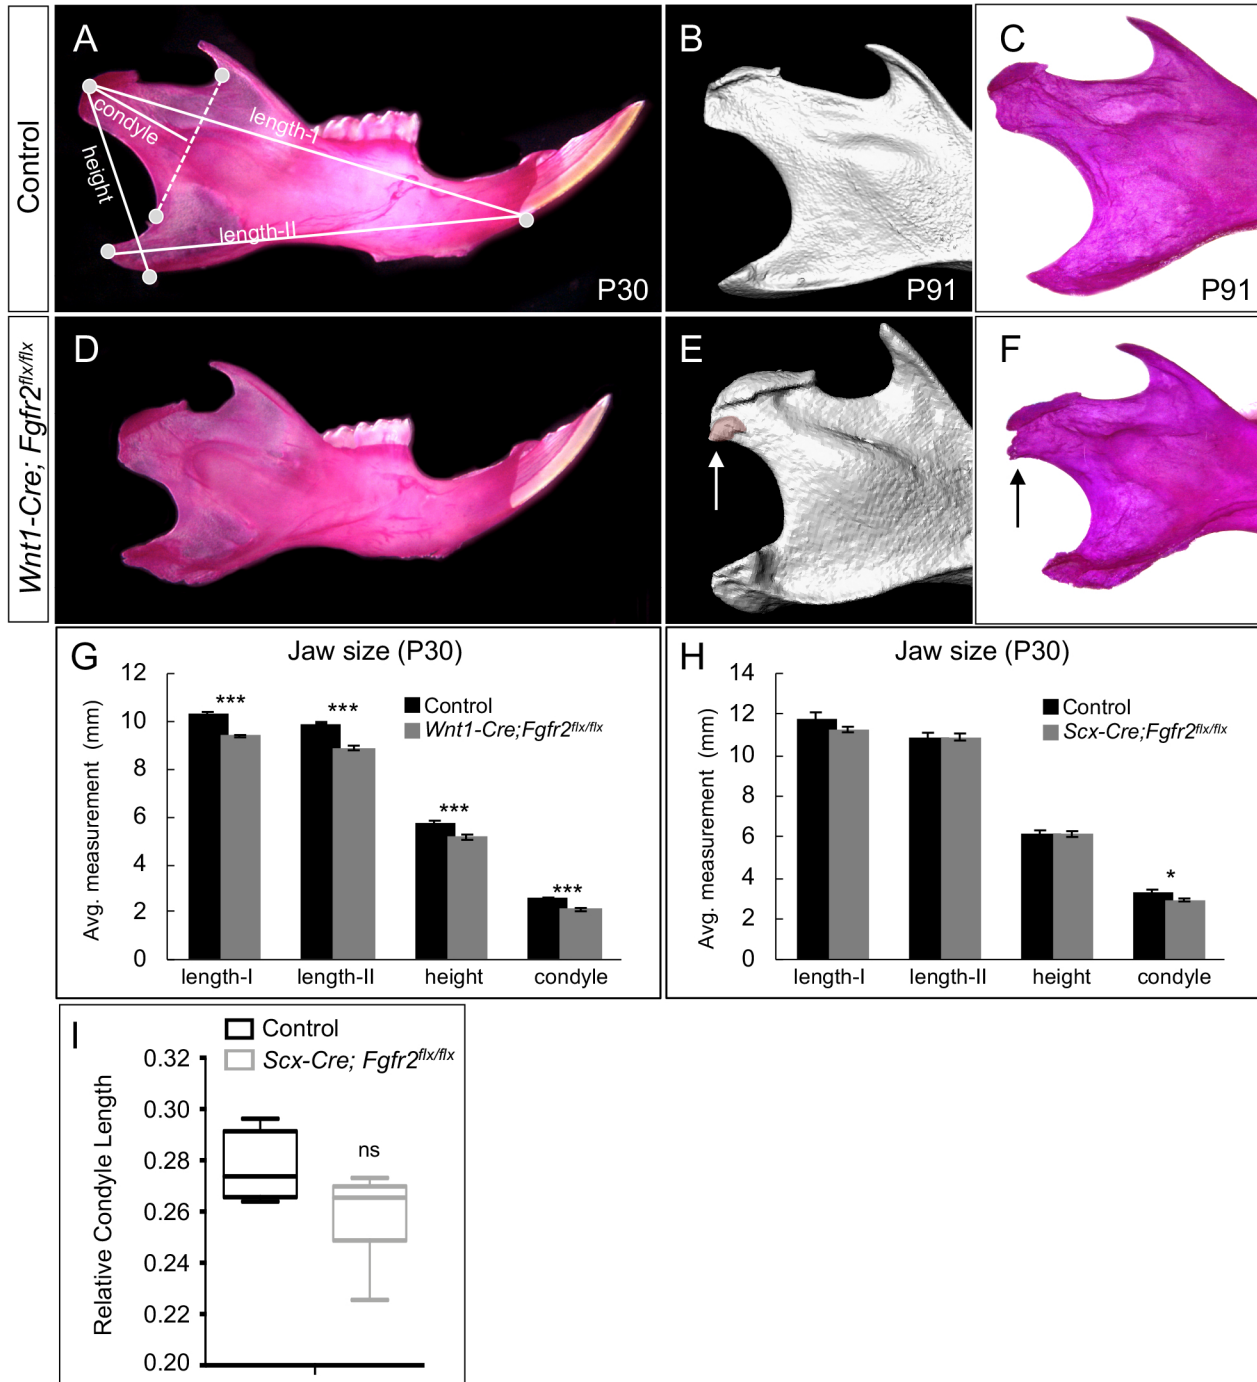

**Figure S2. Loss of *Fgfr2* disrupts formation of the condyle and angular processes.** (A, D) Whole mount with Alizarin red stained mandibles at P30 shows ectopic bone on the condyle and angular process in *Wnt1-Cre; Fgfr2<sup>flx/flx</sup>* mice as compared to controls.  $\mu$ CT analyses and whole mount skeletal preparation of P91 mandibles from control (B-C) and *Wnt1-Cre; Fgfr2<sup>flx/flx</sup>* (E-F)

littermates show that osteophyte-like structures develop on the condyle of the mutant (n=3 littermate pairs). Arrows in panels **E** and **F** indicate ectopic bone on the condyle (pseudo-colored). (**G-H**) Morphometric measurements, indicated by lines in panel **A**, were taken to assess jaw size at P30 (n=6, same sex littermate pairs) in *Wnt1-Cre; Fgfr2<sup>flx/flx</sup>* (**G**) and *Scx-Cre; Fgfr2<sup>flx/flx</sup>* (**H**) versus littermate controls. length-I = mandibular symphysis to condyle articular surface; length-II = mandibular symphysis to angular process; height = angular process to base of condyle articular surface; and condyle = condyle base to condyle articular surface. \* $p < 0.05$  and \*\*\*  $p < 0.001$ , Error bars = SEM. (**I**) Morphometric analysis of relative condyle length in *Scx-Cre; Fgfr2<sup>flx/flx</sup>* mice compared to controls ( $p = 0.12$ )(n=3 same-sex littermate pairs). (ns) not significant. Error bars=SEM

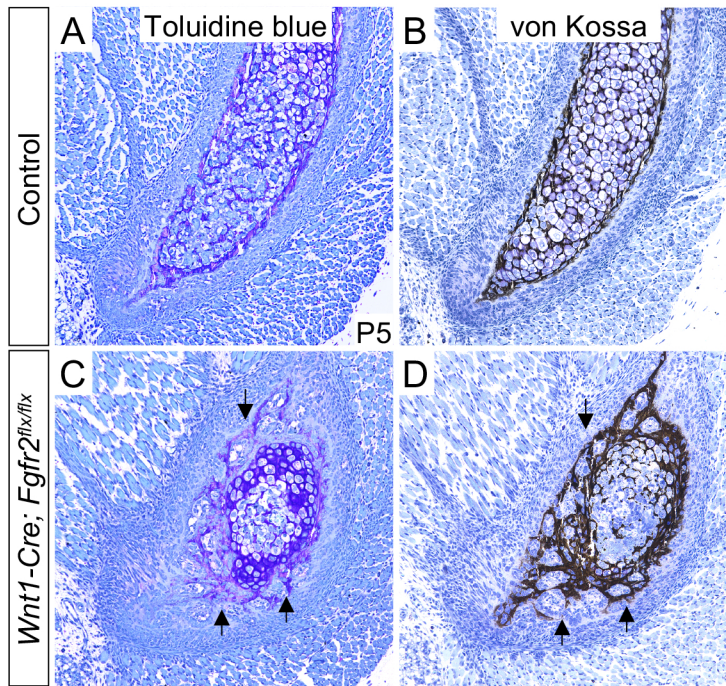

**Figure S3.** *Wnt1-Cre;Fgfr2<sup>flx/flx</sup>* mice develop ectopic endochondral bone in the perichondrium of the angular process. Un-decalcified coronal sections of the angular process at P5 stained with Toluidine blue (A,C) to detect cartilage proteoglycans and von Kossa (B,D) to detect calcium deposits show dual labelling of the ectopic bone in *Wnt1-Cre;Fgfr2<sup>flx/flx</sup>* mice (n=3 littermate pairs).



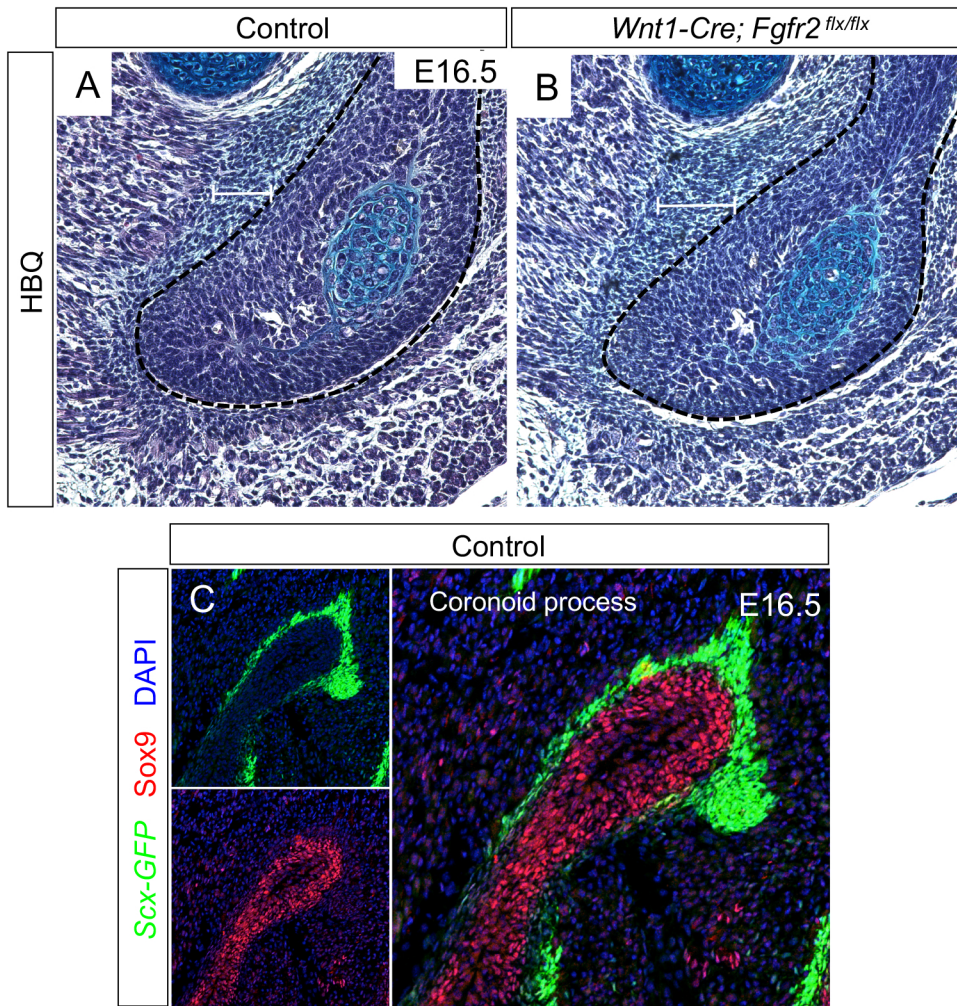

**Figure S4.** Histological sections of the control (A) and *Wnt1-Cre; Fgfr2<sup>flx/flx</sup>* (B) angular processes stained with HBQ (n=3 littermate pairs). The outer boundary of the core cartilage is indicated with dotted line and a bracketed line marks the perichondrium. (C) *Scx-GFP* expression and Sox9 immunofluorescence in the control coronoid process at E16.5.

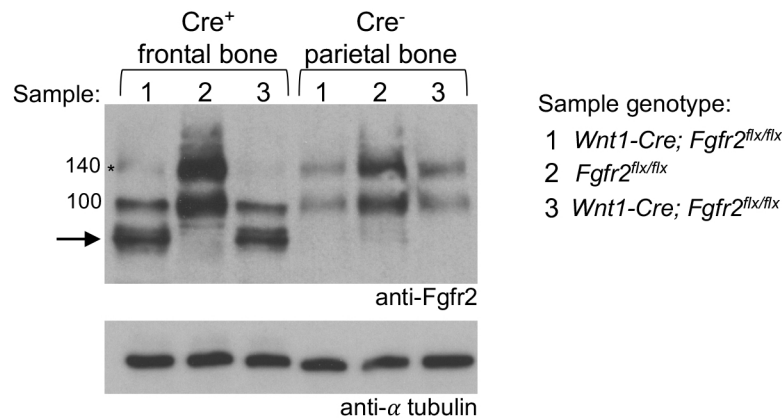

**Figure S5. Anti-Fgfr2 antibody recognizes a truncated protein product.** Western blot analysis of protein lysates extracted from the frontal and parietal bones of P5 mice. The frontal bones are NCC-derived and, therefore, targeted by the *Wnt1-Cre* driver. The parietal bones, on the other hand, are paraxial mesoderm-derived. In frontal bone protein lysates from *Wnt1-Cre; Fgfr2<sup>flx/flx</sup>* mice, the Fgfr2 antibody that recognizes amino acids 771–821, identified a new band (arrow) upon homologous recombination of the *Fgfr2<sup>flx</sup>* allele, which excises exons 7-10 for the IIIb and IIIc isoforms, which include the ligand binding domains, as well as the transmembrane domain (Yu et al., 2003). This band was not present in the frontal and parietal bone lysates of *Fgfr2<sup>flx/flx</sup>* or in the parietal bone lysates of *Wnt1-Cre; Fgfr2<sup>flx/flx</sup>*.

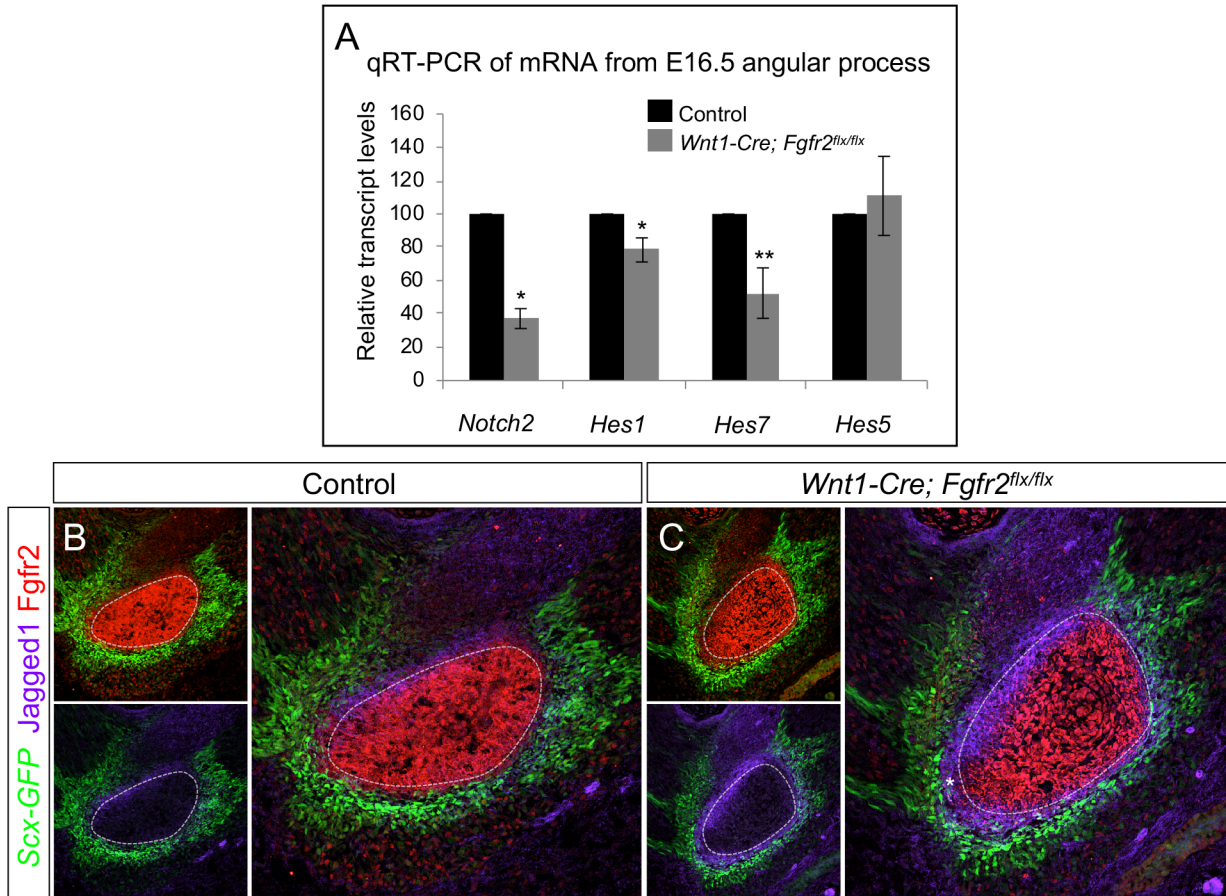

**Figure S6. Expression of Notch pathway members are altered in the angular process of *Wnt1-Cre;Fgfr2<sup>flx/flx</sup>* mice** (A) RT-qPCR analysis of cDNA from E16.5 angular processes show reduced expression of *Notch2* and its targets *Hes1* and *Hes7*, but not *Hes5* in the mutant (n=3 littermate pairs). \* $p < 0.05$ , \*\* $p < 0.01$ , Error bars=SEM. (B) At E16.5, Jagged1 is in the perichondrial region along with Fgfr2. (C) In the *Wnt1-Cre;Fgfr2<sup>flx/flx</sup>* angular process, Jagged1 in the tendon-bone interface is expanded in a region occupied by Fgfr2 knockout cells (asterisk).

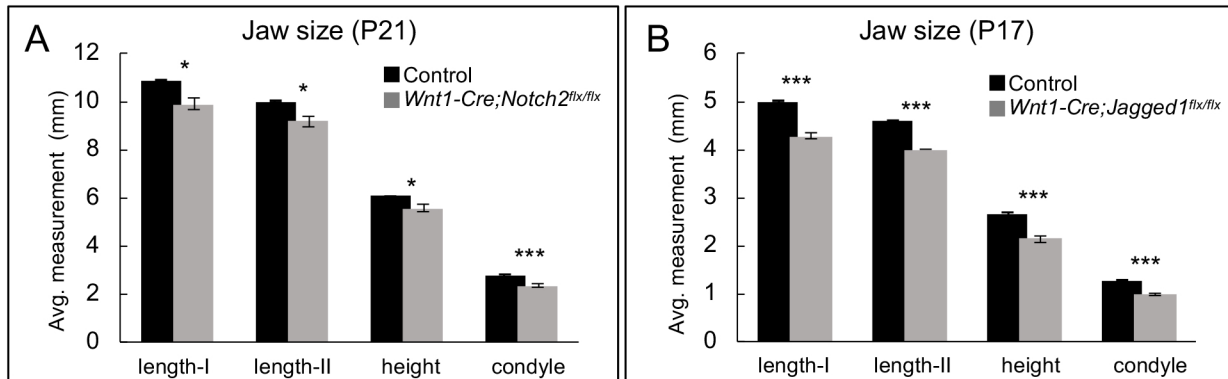

**Figure S7. Morphometric analysis of *Notch2* and *Jagged1* conditional knockout mandibles.**

Morphometric measurements, indicated by lines in panel Supplemental Figure 2A, were taken to assess jaw size at in (A) *Wnt1-Cre; Notch2<sup>flx/flx</sup>* mice at P21 (n=4, same sex littermate pairs) and (B) *Wnt1-Cre; Jagged1<sup>flx/flx</sup>* mice at P17 (n=10, same sex littermate pairs). \* $p < 0.05$  and \*\*\* $p < 0.001$ , Error bars = SEM



**Table S1.** Antibodies for immunofluorescence.

| Antigen      | Species | Source                       | Catalog number | Dilution |
|--------------|---------|------------------------------|----------------|----------|
| Bek (Fgfr2)  | rabbit  | Santa Cruz Biotechnology     | sc-122         | 1:200    |
| Collagen I   | rabbit  | ABCAM                        | ab34710        | 1:500    |
| Collagen II  | mouse   | Developmental Hybridoma Bank | CIIC1          | 1:100    |
| Delta like 1 | rabbit  | ABCAM                        | ab10554        | 1:100    |
| Jagged1      | goat    | Santa Cruz Biotechnology     | sc-6011        | 1:800    |
| Notch2       | rabbit  | Santa Cruz Biotechnology     | sc-5545        | 1:100    |
| Sox9         | rabbit  | Novus Biologicals            | NBP1-85551     | 1:1000   |

**Table S2.** Primer for qPCR.

| Gene          | Primers (5'-3')           | Tm   | Exon | Product size (bp) |
|---------------|---------------------------|------|------|-------------------|
| <i>Hes1</i>   | F: ATCATGGAGAAGAGGCGAAGG  | 59.6 | 2    | 119               |
|               | R: ATGTCTGCCTTCTCTAGCTTGG | 59.8 | 3    |                   |
| <i>Hes5</i>   | F: AGAAGGCCGACATCCTGGAG   | 61.3 | 2    | 100               |
|               | R: TCGCTGTAGTCCTGGTGCAG   | 61.9 | 3    |                   |
| <i>Hes7</i>   | F: AAAGCGGAGATACTGGAGTTCG | 60.2 | 3    | 127               |
|               | R: GGAAGCCGGACAAGTAGCAG   | 60.7 | 4    |                   |
| <i>Notch2</i> | F: GATGGTGCATACTGTGATGTGC | 60.0 | 20   | 82                |
|               | R: GGCACAAGTGTTCAACAGGTAC | 60.0 | 21   |                   |

**Table S3.** Secondary antibodies for immunofluorescence.

| <b>Source</b>            | <b>Catalog number</b> | <b>Secondary antibody description</b>            |
|--------------------------|-----------------------|--------------------------------------------------|
| Thermo Fisher Scientific | A-11008               | Goat anti-rabbit IgG Alexa Fluor 488 conjugate   |
| Thermo Fisher Scientific | A-11004               | Goat anti-mouse IgG Alexa Fluor 568 conjugate    |
| Thermo Fisher Scientific | A-11055               | Donkey anti-goat IgG Alexa Fluor 488 conjugate   |
| Thermo Fisher Scientific | A-11057               | Donkey anti-goat IgG Alexa Fluor 568 conjugate   |
| Thermo Fisher Scientific | A-21206               | Donkey anti-rabbit IgG Alexa Fluor 488 conjugate |
| Thermo Fisher Scientific | A-21447               | Donkey anti-goat IgG Alexa Fluor 647 conjugate   |
| Thermo Fisher Scientific | A-31573               | Donkey anti-rabbit IgG Alexa Fluor 647 conjugate |
